# Supplementary material for: Biochemical Characterization of the Seed Quality of a Collection of White Lupin Landraces from Southern Italy
Source: MDPI journal article supplement (doi:10.3390/plants13060785), 2024-03-10
Supplement: s1 [file s1]

*Supplementary Material*

# **Biochemical Characterization of the Seed Quality of a Collection of White Lupin Landraces from Southern Italy**

**Alfio Spina <sup>1</sup>, Stefano De Benedetti <sup>2</sup>, Giuditta Carlotta Heinzl <sup>2</sup>, Giulia Ceravolo <sup>2</sup>, Chiara Magni <sup>2</sup>, Davide Emide <sup>2</sup>, Giulia Castorina <sup>3</sup>, Gabriella Consonni <sup>3</sup>, Michele Canale <sup>1</sup> and Alessio Scarafoni <sup>2,\*</sup>**

<sup>1</sup> Council for Agricultural Research and Economics (CREA), Centro di Ricerca Cerealicoltura e Colture Industriali, Corso Savoia 190, 95024 Acireale, Italy

<sup>2</sup> Department of Food, Environmental and Nutritional Sciences, Università degli Studi di Milano, 20133 Milan, Italy

<sup>3</sup> Department of Agricultural and Environmental Sciences, Università degli Studi di Milano, Via G. Celoria 2, 20133 Milan, Italy

\* Correspondence: [alessio.scarafoni@unimi.it](mailto:alessio.scarafoni@unimi.it)

**Supplementary Table S1.** Weight of one hundred seeds and main biochemical characteristics of the investigated white lupin genotypes. Results are reported as mean  $\pm$  standard deviation referred to the seed Dry Weight (DW). The significance level was set at 0.05 and it is reported with the lowercase letters in the brackets; the same letter means the difference is not statistically significant. FRAP: Ferric Reducing Ability of Plasma; TIA: Trypsin inhibitory activity; nd: not determined.

| Name        | Hundred seeds weight (g) | Protein (g/kg DW)    | Lipid (g/kg DW)      | FRAP (mmol Eq FeSO <sub>4</sub> /g) | Polyphenols (mg Eq Quercetin/g) | Phytic acid (g/kg DW) | Phosphorous (g/kg DW) | TIA (%)               |
|-------------|--------------------------|----------------------|----------------------|-------------------------------------|---------------------------------|-----------------------|-----------------------|-----------------------|
| Leonforte 1 | 61.07 $\pm$ 1.77 (d)     | 312 $\pm$ 19 (cdefg) | 101 $\pm$ 3 (abc)    | 116.5 $\pm$ 4.9 (efg)               | 7.5 $\pm$ 0.3 (bcd)             | 2.1 $\pm$ 0.1 (a)     | 0.58 $\pm$ 0.04 (c)   | 7.0 $\pm$ 0.7 (gh)    |
| Leonforte 2 | 61.11 $\pm$ 2.84 (d)     | 312 $\pm$ 47 (cdefg) | 108 $\pm$ 4 (a)      | 156.6 $\pm$ 7.6 (b)                 | 8.1 $\pm$ 0.6 (b)               | 2.3 $\pm$ 0.3 (a)     | 0.66 $\pm$ 0.06 (abc) | -1.1 $\pm$ 3.1 (h)    |
| Leonforte 3 | 45.72 $\pm$ 2.13 (e)     | 274 $\pm$ 1 (fgh)    | 95 $\pm$ 2 (abcdef)  | 139.8 $\pm$ 5.9 (bcde)              | 7.3 $\pm$ 1.3 (bcde)            | 2.3 $\pm$ 0.1 (a)     | 0.65 $\pm$ 0.04 (abc) | 5.1 $\pm$ 0.4 (gh)    |
| Leonforte 4 | 35.21 $\pm$ 0.08 (d)     | 309 $\pm$ 6 (defg)   | 95 $\pm$ 4 (abcdef)  | 129.7 $\pm$ 13.7 (cdef)             | 7.6 $\pm$ 0.3 (bcd)             | 2.7 $\pm$ 0.1 (a)     | 0.75 $\pm$ 0.03 (abc) | -1.8 $\pm$ 1.8 (h)    |
| Leonforte 5 | 71.85 $\pm$ 0.04 (c)     | 311 $\pm$ 8 (cdefg)  | 99 $\pm$ 4 (abcd)    | 117.2 $\pm$ 4.0 (efg)               | 7.0 $\pm$ 0.1 (bcdef)           | 2.8 $\pm$ 0.3 (a)     | 0.79 $\pm$ 0.06 (ab)  | 28.4 $\pm$ 2.5 (b)    |
| Leonforte 6 | 56.85 $\pm$ 1.26 (d)     | 343 $\pm$ 4 (cdef)   | 107 $\pm$ 6 (ab)     | 109.0 $\pm$ 2.8 (fg)                | 6.1 $\pm$ 0.4 (def)             | 3.0 $\pm$ 0.1 (a)     | 0.84 $\pm$ 0.03 (a)   | 19.6 $\pm$ 4.2 (cd)   |
| Acireale    | 76.53 $\pm$ 0.27 (c)     | 302 $\pm$ 1 (efgh)   | 86 $\pm$ 3 (bcdefgh) | 235.7 $\pm$ 11.7 (a)                | 7.3 $\pm$ 0.3 (bcde)            | 2.5 $\pm$ 0.2 (a)     | 0.71 $\pm$ 0.08 (abc) | 19 $\pm$ 3.1 (cde)    |
| Canicattini | 22.57 $\pm$ 0.07 (mn)    | 379 $\pm$ 22 (bcde)  | 94 $\pm$ 6 (abcdef)  | 145.4 $\pm$ 7.9 (bcd)               | 10.4 $\pm$ 0.6 (a)              | 2.4 $\pm$ 0.1 (a)     | 0.69 $\pm$ 0.04 (abc) | 11.7 $\pm$ 1.3 (defg) |
| Modica      | 31.38 $\pm$ 1.24 (gl)    | 390 $\pm$ 23 (abcd)  | 75 $\pm$ 4 (fgh)     | 125.9 $\pm$ 5.8 (def)               | 7.1 $\pm$ 0.1 (bcdef)           | 2.2 $\pm$ 0.1 (a)     | 0.63 $\pm$ 0.03 (bc)  | 16.5 $\pm$ 3.5 (def)  |
| Scicli      | 33.25 $\pm$ 1.44 (gi)    | 428 $\pm$ 1 (ab)     | 51 $\pm$ 2 (i)       | 148.5 $\pm$ 4.9 (bcd)               | 7.5 $\pm$ 0.3 (bcd)             | 2.7 $\pm$ 0.3 (a)     | 0.75 $\pm$ 0.07 (abc) | 16.5 $\pm$ 2.1 (def)  |
| Grammichele | 63.45 $\pm$ 0.78 (d)     | 328 $\pm$ 24 (cdefg) | 97 $\pm$ 4 (abcde)   | 117.6 $\pm$ 3.7 (efg)               | 6.3 $\pm$ 0.4 (def)             | 2.3 $\pm$ 0.3 (a)     | 0.65 $\pm$ 0.07 (abc) | 10.8 $\pm$ 2.0 (efg)  |
| Calabria 1  | 32.10 $\pm$ 0.42 (gl)    | 447 $\pm$ 29 (ab)    | 89 $\pm$ 4 (abcdefg) | 124.8 $\pm$ 2.8 (def)               | 7.9 $\pm$ 0.6 (bc)              | 2.1 $\pm$ 0.1 (a)     | 0.59 $\pm$ 0.04 (bc)  | 10.5 $\pm$ 0.8 (fg)   |
| Calabria 2  | 47.58 $\pm$ 1.05 (e)     | 223 $\pm$ 2 (h)      | 66 $\pm$ 6 (hi)      | 153.8 $\pm$ 4.2 (bc)                | 6.7 $\pm$ 0.4 (bcdef)           | 2.3 $\pm$ 0.4 (a)     | 0.64 $\pm$ 0.08 (abc) | 12.7 $\pm$ 1.8 (defg) |
| Calabria 3  | 40.86 $\pm$ 1.68 (gl)    | 463 $\pm$ 15 (a)     | 81 $\pm$ 8 (cdefgh)  | 98.3 $\pm$ 1.0 (g)                  | 5.7 $\pm$ 0.1 (f)               | 2.4 $\pm$ 0.3 (a)     | 0.68 $\pm$ 0.03 (abc) | 0.1 $\pm$ 1.1 (h)     |
| Calabria 4  | 32.69 $\pm$ 0.44 (gl)    | 392 $\pm$ 13 (abc)   | 80 $\pm$ 6 (defgh)   | 117.8 $\pm$ 4.0 (efg)               | 7.3 $\pm$ 0.6 (bcde)            | 2.2 $\pm$ 0.1 (a)     | 0.63 $\pm$ 0.03 (bc)  | 2 $\pm$ 1.4 (h)       |
| Puglia      | 25.10 $\pm$ 0.85 (d)     | 258 $\pm$ 21 (gh)    | 71 $\pm$ 6 (ghi)     | 128.8 $\pm$ 0.3 (cdef)              | 6.6 $\pm$ 0.6 (bcdef)           | 2.5 $\pm$ 0.1 (a)     | 0.70 $\pm$ 0.07 (abc) | -0.5 $\pm$ 2.1 (h)    |
| Lecce       | 105.00 $\pm$ 2.8 (a)     | 324 $\pm$ 2 (cdefg)  | 107 $\pm$ 7 (ab)     | 98.4 $\pm$ 4.8 (g)                  | 5.9 $\pm$ 0.3 (ef)              | 2.5 $\pm$ 0.3 (a)     | 0.71 $\pm$ 0.01 (abc) | 25.9 $\pm$ 4.4 (bc)   |
| Basilicata  | 34.30 $\pm$ 0.42 (fh)    | 468 $\pm$ 33 (a)     | 77 $\pm$ 6 (efgh)    | 118.3 $\pm$ 2.4 (efg)               | 6.4 $\pm$ 0.1 (cdef)            | 2.4 $\pm$ 0.1 (a)     | 0.75 $\pm$ 0.03 (abc) | -2.4 $\pm$ 3.7 (h)    |
| Molise      | 87.05 $\pm$ 3.23 (b)     | 283 $\pm$ 28 (fgh)   | 75 $\pm$ 6 (fgh)     | 138.7 $\pm$ 8.9 (bcde)              | 6.1 $\pm$ 0.1 (def)             | 2.3 $\pm$ 0.3 (a)     | 0.64 $\pm$ 0.03 (abc) | -1.5 $\pm$ 3.5 (h)    |
| Ares        | 35.58 $\pm$ 1.26 (d)     | 394 $\pm$ 5 (abc)    | 101 $\pm$ 8 (abcd)   | 112.4 $\pm$ 6.2 (fg)                | 2.8 $\pm$ 0.2 (g)               | 2.6 $\pm$ 0.2 (a)     | 0.70 $\pm$ 0.07 (abc) | 65.7 $\pm$ 0.3 (a)    |

|                    | <i>Proteins</i> | <i>Lipids</i> | <i>TIA</i> | <i>FRAP</i> | <i>Polyphenols</i> | <i>Phytic Acid</i> | <i>P</i> | <b>Color range</b> |
|--------------------|-----------------|---------------|------------|-------------|--------------------|--------------------|----------|--------------------|
| <i>Proteins</i>    | 1.000           |               |            |             |                    |                    |          | 1.000              |
| <i>Lipids</i>      | -0.169          | 1.000         |            |             |                    |                    |          | 0.750              |
| <i>TIA</i>         | 0.076           | 0.277         | 1.000      |             |                    |                    |          | 0.500              |
| <i>FRAP</i>        | -0.255          | -0.227        | -0.081     | 1.000       |                    |                    |          | 0.250              |
| <i>Polyphenols</i> | -0.046          | -0.065        | -0.562     | 0.356       | 1.000              |                    |          | 0                  |
| <i>Phytic Acid</i> | -0.037          | 0.175         | 0.391      | -0.026      | -0.218             | 1.000              |          | -0.250             |
| <i>P</i>           | 0.074           | 0.132         | 0.349      | -0.056      | -0.248             | 0.966              | 1.000    | -0.500             |
|                    |                 |               |            |             |                    |                    |          | -0.750             |
|                    |                 |               |            |             |                    |                    |          | -1.000             |

**Supplementary Figure S1.** Correlation matrix: +1 = strong positive correlation (green); -1 = strong negative correlation (red). Table highlights a strong positive correlation between phosphorous and phytic acid content, and a positive correlation between polyphenol content and reducing power.
